# Supplementary material for: Using Integrative Analysis of DNA Methylation and Gene Expression Data in Multiple Tissue Types to Prioritize Candidate Genes for Drug Development in Obesity
Source: Front Genet. 2018 Dec 19;9:663. doi: 10.3389/fgene.2018.00663 (PMC6305755; doi:10.3389/fgene.2018.00663)
Supplement: Supplementary file 1 [file Table_1.xlsx]

## Sheet: Supplementary Table 1
Supplementary Table 1.Significantly associated CpG sites in peripheral blood (N=119)
CpG	P	N	Dir	Gene
cg06500161	4.76e-122	16737	+++++++++	ABCG1
cg00574958	1.44475e-98	17748	-------------	CPT1A
cg11024682	5.01e-81	17670	+++++++++++	SREBF1
cg07573872	2.22e-56	18370	--------------	SBNO2
cg27243685	3.64e-55	17247	++++++++++	ABCG1
cg18181703	1.73e-51	13417	------------+	SOCS3
cg09349128	2.39e-51	13694	--------	NA
cg26403843	6.72e-46	16737	+++++++++	RNF145
cg04927537	2.64e-44	16737	+++++++++	LGALS3BP
cg06192883	2.51e-40	16737	+++++++++	MYO5C
cg25178683	2.68e-36	16737	+++++++++	LGALS3BP
cg03078551	4.23e-36	13927	-------	NA
cg07136133	1.67e-35	14627	----------	PRR5L
cg19750657	2.39e-34	11974	++++++++++	UFM1
cg13123009	1.08e-33	17670	+++++++++++	LY6G6E
cg06946797	4.81e-33	17437	------------	NA
cg09664445	7.17e-33	16737	+++++++++	KIAA0664
cg08857797	4.55e-32	12586	+++++++++	VPS25
cg14476101	4.38973e-30	12265	--------	PHGDH
cg07814318	3.94e-29	10336	++++++++	KLF13
cg12992827	8.4e-29	12994	-----	NA
cg12593793	2.84e-28	11974	----------	NA
cg26033520	1.97e-27	12994	+++++	NA
cg16672562	1.04e-25	6365	++++++	HIF3A
cg17501210	2.06e-25	7797	-------	RPS6KA2
cg07504977	3.33867e-25	12265	++++++++	NA
cg08972190	7.51e-24	12994	+++++	MAD1L1
cg18608055	2.35e-23	8231	------	SBNO2
cg26470501	5.03e-23	11974	----------	BCL3
cg24531955	2.72e-22	11974	----------	LOXL2
cg10508317	8.94e-22	11974	----------	SOCS3
cg12170787	1.23e-21	1210	----	SBNO2
cg06876354	1.33e-21	9206	++++++	RALB
cg09152259	3.1e-21	8231	---------	NA
cg13708645	7.02e-21	9206	++++++	KDM2B
cg23998749	9.02e-21	9206	++++++	NA
cg02119938	1.13e-20	9626	----	ACSBG1
cg16611584	7.27e-20	11974	++++++++++	AKAP10
cg15721584	9.07e-20	8041	++++	SOX2OT
cg07037944	1.43e-19	11974	----------	DAPK2
cg04011474	2.02e-19	11974	----------	NA
cg03725309	2.1e-19	11784	--------	SARS
cg06164260	2.73e-19	8231	------	BCL6
cg00851028	4.41e-18	11076	+++++	NA
cg22891070	4.93e-18	5810	++++++	HIF3A
cg04816311	7.5e-18	8318	++++	C7orf50
cg07094298	1.06e-17	4443	-------	TNIP2
cg08548559	1.13e-17	11974	----------	PIK3IP1
cg14017402	1.41e-17	9206	++++++	NA
cg09554443	2.58e-17	9626	----	CD247
cg09831562	8.32e-17	8041	++++	SOX2OT
cg27614723	3.1e-16	12994	+++++	SLCO3A1
cg27146050	4.84e-16	6365	++++++	HIF3A
cg24678869	6.16e-16	13369	++++++++	DENND4B
cg03940776	8.96e-16	8231	------	SYNJ2
cg04610187	1.54e-15	8231	------	NA
cg24174557	1.71e-15	8231	------	TMEM49
cg10601624	2.8e-15	1210	----	NA
cg00863378	6.13e-15	13383	+++++	BBS2
cg10919522	1.92e-14	8231	------	C14orf43
cg21139312	2.28e-14	3545	++	MSI2
cg17178175	3.38e-14	8231	------	NFE2L2
cg19589396	3.66e-14	8231	------	NA
cg18568872	6.98e-14	5463	++	ZNF710
cg18219562	1e-13	9237	++++	NA
cg07960624	1.15e-13	4443	------	SAMD12
cg15871086	2.02e-13	5463	++	NA
cg03957124	2.05e-13	8231	------	NA
cg06872964	3.13e-13	3545	++	IFI44L
cg17061862	3.4e-13	1210	----	NA
cg26950531	3.77e-13	4253	-----	DPF1
cg20954977	4.12e-13	5463	++	B3GNT7
cg13134297	5.11e-13	2635	----	NA
cg05845030	6.84e-13	8231	------	DCN
cg17560136	1.02e-12	5463	++	EPB49
cg15159104	3.68e-12	3545	++++	MAP1A
cg11592786	4.57e-12	5463	--	NA
cg13997435	4.62e-12	8231	-----	S100A2
cg01671681	5.75e-12	4443	-------	PLCH1
cg08726900	9.3e-12	9626	----	ANKRD11
cg01844514	2.38e-11	5463	++	ZNF862
cg18307303	4.23e-11	5463	++	IL12B
cg04869770	8.53e-11	5463	++	PBX1
cg06178669	1.28e-10	700	---	NA
cg04332373	1.7e-10	5031	+++++	CD38
cg21585138	1.7e-10	700	---	CISH
cg26354221	2.41e-10	5463	++	ADORA2A
cg11554650	2.62e-10	700	---	KIAA1949
cg15695155	3.39e-10	5463	++	KDM2B
cg13823169	5.39e-10	700	---	NA
cg16936953	1.32e-09	700	---	TMEM49
cg11376147	1.35e-09	8041	----	SLC43A1
cg09701700	1.47e-09	700	---	MIR146B
cg06096336	1.49e-09	3545	++	PSMD1;HTR2B
cg18030453	1.53e-09	3545	++	LARS2
cg24776142	1.72e-09	9626	++++	ATXN1
cg27108889	2.31e-09	700	---	C3orf27
cg27209729	2.42e-09	700	---	NRXN2
cg06568880	2.52e-09	700	---	SMG6
cg21163717	3.24e-09	700	---	DOK2
cg03421440	3.89e-09	3545	--	BRDT
cg23005227	4.7e-09	700	---	CISH
cg22866430	1.03e-08	700	+++	SNORA59A;VPS13D
cg05603985	1.15e-08	700	---	SKI
cg21506299	1.22e-08	3545	--	MAP3K5
cg12054453	1.32e-08	700	---	TMEM49
cg00741986	1.38e-08	700	---	TNIP2
cg15903032	2.04e-08	3545	++	NA
cg15011409	2.23e-08	700	+++	ICAM5
cg03650189	2.38e-08	700	+++	ICAM5
cg06202737	2.44e-08	700	---	NA
cg23076949	2.48e-08	700	+++	NA
cg06647068	2.89e-08	700	---	CHST11
cg03183540	3.08e-08	700	---	NA
cg01979157	3.73e-08	700	---	SKI
cg01820374	4.53e-08	700	---	LAG3
cg03257930	6.24e-08	700	---	NA
cg14986890	6.25e-08	700	---	RARRES1
cg00760203	8.63e-08	700	---	PLXDC1
Abbreviations: N, the total sample size of the corresponding CpG sites; Dir, direction of association with body mass index;NA, not available.

## Sheet: Supplementary Table 2
Supplementary Table 2.Differentially expressed genes in SAT of obesity patients (GSE2508)
ID	P	log2FC	Gene
38125_at	2.53e-10	1.76048	SERPINE1
31719_at	1.59e-09	2.74474	FN1
1693_s_at	3.44e-09	3.65333	TIMP1
40078_at	3.47e-09	2.1382	PRSS23
189_s_at	4.86e-09	2.54198	PLAUR
35803_at	1.87e-08	1.59632	RND3
36007_at	2.51e-08	2.14242	OLFML2B
34802_at	2.98e-08	1.80465	COL6A2
36638_at	2.29e-07	2.43129	CTGF
36686_at	2.38e-07	1.95363	ALDH1A3
931_at	3e-07	4.28179	GPR183
39506_at	3.72e-07	2.05931	BICC1
1665_s_at	9.3e-07	2.73077	TYMP
35926_s_at	1.37e-06	2.81904	LYZ
38363_at	1.48e-06	3.71163	TYROBP
35474_s_at	1.53e-06	1.82738	COL1A1
32666_at	1.58e-06	2.06744	CXCL12
39409_at	1.96e-06	1.84885	C1R
32307_s_at	2.02e-06	2.09522	COL1A2
40496_at	2.1e-06	1.31936	C1S
41739_s_at	2.31e-06	1.37023	CALD1
1520_s_at	2.62e-06	2.32976	IL1B
33866_at	3.35e-06	1.22442	TPM4
33274_f_at	3.7e-06	3.5928	IGLC1
2036_s_at	3.7e-06	1.58615	CD44
41723_s_at	4.5e-06	1.69662	LOC101060835///LOC100996809///HLA-DRB6///HLA-DRB5///HLA-DRB4///HLA-DRB3///HLA-DRB1///HLA-DQB1
41320_s_at	5.08e-06	1.13723	LRRFIP1
38972_at	6.72e-06	1.08623	KCTD12
32755_at	6.89e-06	1.69912	ACTA2
31888_s_at	7.27e-06	2.10261	PHLDA2
35330_at	7.29e-06	1.52041	FLNC
37611_at	8.65e-06	2.60827	TNFRSF11B
39753_at	8.9e-06	1.27259	ITGA5
32227_at	9.66e-06	1.73669	SRGN
40051_at	1.02e-05	1.08869	TRAM2
38096_f_at	1.07e-05	2.15448	HLA-DPB1
37864_s_at	1.18e-05	2.85439	MIR8071-2///MIR8071-1///IGHV4-31///IGHM///IGHG4///IGHG3///IGHG2///IGHG1
31783_at	1.19e-05	1.27366	RENBP
925_at	1.23e-05	1.55498	IFI30///PIK3R2
595_at	1.28e-05	1.36325	TNFAIP3
36103_at	1.37e-05	1.83623	CCL3
36674_at	1.43e-05	2.00016	CCL4
32321_at	1.44e-05	1.13547	HLA-E
32818_at	1.46e-05	2.51728	TNC
36931_at	1.61e-05	1.55055	TAGLN
34375_at	1.77e-05	2.41016	CCL2
1069_at	1.79e-05	2.58562	PTGS2
32134_at	1.94e-05	1.96991	TES
39634_at	2.08e-05	1.16597	SLIT2
38194_s_at	2.14e-05	3.29659	IGK///IGKC
39248_at	2.36e-05	1.92819	AQP3
32035_at	2.36e-05	1.4272	HLA-DRB4
669_s_at	2.5e-05	2.36877	IRF1
38796_at	2.59e-05	2.00785	C1QB
37039_at	2.59e-05	1.34348	HLA-DRA
35016_at	2.73e-05	1.29398	CD74
37598_at	2.81e-05	1.732	RASSF2
39649_at	2.84e-05	1.14203	ARHGAP4
38052_at	2.84e-05	1.92424	F13A1
37724_at	2.85e-05	1.57881	MYC
40698_at	2.9e-05	1.18077	CLEC2B
38087_s_at	3.09e-05	1.33675	S100A4
38038_at	3.64e-05	1.40844	LUM
36908_at	3.93e-05	1.5737	MRC1
35099_at	3.93e-05	1.4045	APOL1
1237_at	4.28e-05	1.34463	IER3
1198_at	4.36e-05	1.09864	EDNRB
40126_at	4.76e-05	1.85957	PRRX1
38336_at	4.86e-05	1.44324	FRMD4B
39049_at	4.97e-05	1.57305	GPSM3
37743_at	4.99e-05	1.99044	FEZ1
35372_r_at	5.03e-05	2.07996	CXCL8
41163_at	5.43e-05	1.15366	TMED3
32056_at	5.52e-05	1.61263	2018-09-04
37023_at	5.82e-05	2.59465	LCP1
38378_at	5.94e-05	1.69711	CD53
33295_at	5.95e-05	1.36365	ACKR1
38379_at	6.05e-05	1.5296	GPNMB
38466_at	6.12e-05	1.11158	CTSK
32314_g_at	6.34e-05	1.63321	TPM2
39182_at	6.45e-05	2.01179	EMP3
1819_at	6.54e-05	1.45232	RAP2A
41531_at	6.56e-05	1.56715	TM4SF1
607_s_at	7.05e-05	1.56277	VWF
36711_at	7.47e-05	1.43024	MAFF
41350_at	9.03e-05	1.15278	COL6A1
36993_at	0.000104	1.63084	PDGFRB
39593_at	0.000105	2.24614	FGL2
1737_s_at	0.00012	1.01558	IGFBP4
36497_at	0.000124	1.77333	AHNAK2
36513_at	0.000138	2.27364	MFAP5
41779_at	0.000142	1.48323	RGS16
34403_at	0.000149	1.32529	MFGE8
33772_at	0.00015	1.41604	PTGER4
996_at	0.000156	1.40288	FGF1
38855_s_at	0.000158	1.0508	OLFM1
37044_at	0.000166	1.56857	MIR7110///PDIA5
34714_at	0.000169	1.53324	SAMHD1
31897_at	0.000172	1.11844	FILIP1L
37402_at	0.000179	1.52215	RNASE1
32855_at	0.000181	1.52928	LDLR
33055_at	0.000183	1.93966	CYP7B1
41396_at	0.000184	1.11058	CLIP2
41191_at	0.000186	1.53896	PALLD
37461_at	0.000199	1.60674	ANGPT2
32249_at	0.000202	1.50339	CFHR1///CFH
38111_at	0.000206	2.08624	VCAN
36575_at	0.000216	1.09159	RGS1
38323_at	0.000217	1.70864	CPVL
41352_at	0.000221	1.4164	ST6GAL1
35898_at	0.000222	1.50404	WISP2
41027_at	0.000228	1.54381	FOXC1
38770_at	0.000244	1.23535	ADAM12
408_at	0.00025	2.18134	CXCL1
37918_at	0.000252	1.99613	ITGB2
41164_at	0.000253	1.35771	IGHM
37187_at	0.000279	2.17143	CXCL2
36889_at	0.000286	2.08155	FCER1G
1741_s_at	0.000296	1.49208	IGFBP2
37006_at	0.000303	2.31593	JCHAIN
425_at	0.000309	1.81412	IFI27
37777_at	0.000315	1.62271	PTPRB
38488_s_at	0.000317	1.30087	IL15
36909_at	0.000317	1.2507	WEE1
547_s_at	0.000328	2.05317	NR4A2
36454_at	0.000333	1.94976	CA12
36976_at	0.000334	1.74365	CDH11
33790_at	0.00035	1.21695	CCL15-CCL14///CCL14
38407_r_at	0.000356	2.08632	PTGDS
2031_s_at	0.000356	1.07635	CDKN1A
31438_s_at	0.000361	1.30322	CD163
38370_at	0.000365	1.7755	TIAM1
40690_at	0.000375	1.52723	CKS2
529_at	0.000377	1.6486	DUSP5
1984_s_at	0.000383	1.55934	ARHGDIB
33802_at	0.00039	1.34896	HMOX1
36958_at	0.000399	1.113	ZYX
859_at	0.000412	2.71591	CYP1B1
41425_at	0.000429	1.06661	FLI1
33910_at	0.000441	2.27099	PTPRD
1648_at	0.000451	1.08848	OSMR
40665_at	0.000485	1.1152	FMO3
33428_s_at	0.0005	1.44236	ATRN
1597_at	0.000511	1.06294	GAS6
37759_at	0.000541	1.08053	LAPTM5
2092_s_at	0.000611	1.42686	SPP1
41439_at	0.000613	1.17608	MYO1B
39389_at	0.000639	1.16004	CD9
31859_at	0.000667	1.52027	MMP9
34052_at	0.000669	1.13337	STX2
36695_at	0.000681	1.34233	OLFML1
37398_at	0.00075	1.01059	PECAM1
39787_at	0.00077	1.07455	PEMT
38642_at	0.00077	1.35816	ALCAM
39175_at	0.000771	1.7489	PFKP
38261_at	0.00078	2.01781	ABCC3
37603_at	0.000818	1.55329	IL1RN
41471_at	0.000852	2.20447	S100A9
37328_at	0.000855	1.42474	PLEK
32718_at	0.000863	1.35633	TPST1
37011_at	0.000934	1.74641	AIF1
34022_at	0.00094	1.54551	CXCL3
1385_at	0.000951	1.07489	TGFBI
37200_at	0.000959	1.48422	FCGR3A
33813_at	0.00099	1.00651	TNFRSF1B
36852_at	0.00101	1.45619	TUSC3
34770_at	0.00101	1.10581	MAP3K8
33143_s_at	0.00107	1.14226	MIR6787///SLC16A3
36979_at	0.00109	1.32111	SLC2A3
41700_at	0.00109	1.21887	F2R
41184_s_at	0.00111	1.36783	PSMB8
1882_g_at	0.00112	1.21068	MECOM
1451_s_at	0.00115	1.26897	POSTN
38994_at	0.00124	1.00589	SOCS2
37823_at	0.00125	2.17641	CCL8
37863_at	0.00126	1.78053	EGR2
41827_f_at	0.00126	1.18014	GUSBP11
40479_at	0.00127	1.31261	FYN
33331_at	0.00129	1.31175	MALL
38396_at	0.00131	1.24144	MAP1B
32873_at	0.00135	1.68923	KCND2
1997_s_at	0.00135	1.62821	BAX
34210_at	0.0014	1.92109	CD52
37028_at	0.00144	1.03073	PPP1R15A
41096_at	0.00145	1.92976	S100A8
37324_at	0.0015	1.15652	TFRC
1278_at	0.00155	1.57387	AXL
36825_at	0.00159	1.50537	TRIM22
39748_at	0.00161	1.23513	SLC7A1
32905_s_at	0.00161	1.4789	TPSB2///TPSD1///TPSAB1
39279_at	0.00162	1.30109	BMP6
37960_at	0.00164	1.45469	CHST2
36010_at	0.00167	1.00757	MEOX1
39208_i_at	0.00169	2.10542	PPBP
1461_at	0.00171	1.14117	NFKBIA
404_at	0.00173	1.36132	IL4R
38759_at	0.00173	1.09624	BTN3A2
38299_at	0.00174	2.13829	IL6
36593_at	0.00174	1.05781	EXT2
287_at	0.00176	1.35847	ATF3
36661_s_at	0.00181	1.3771	CD14
1364_at	0.00181	2.0561	PTPRZ1
1466_s_at	0.00191	1.33257	FGF7
33232_at	0.00193	1.31201	CRIP1
37279_at	0.00194	1.55884	GEM
37688_f_at	0.00201	2.00349	FCGR2A
36508_at	0.00205	1.14389	GPC4
36861_at	0.00207	1.35372	MXRA5
34384_at	0.00212	1.05472	ABCC1
1736_at	0.00213	1.11295	IGFBP6
40614_at	0.00213	1.11438	SHB
33803_at	0.00219	1.05969	THBD
38750_at	0.0022	1.84009	NOTCH3
40662_g_at	0.00223	1.71927	NR4A3
41433_at	0.0023	2.05048	VCAM1
39288_at	0.00234	1.34398	CADM3
614_at	0.0024	1.08838	PLA2G2A
35036_at	0.0024	1.49981	CD93
1292_at	0.0025	1.45765	DUSP2
32083_at	0.00256	1.83359	GPR137B
39070_at	0.00259	1.23673	FSCN1
37319_at	0.0026	1.12112	IGFBP3
1820_g_at	0.0026	1.02222	RAP2B///RAP2A
717_at	0.00262	1.10462	TRIB2
1767_s_at	0.00273	1.01699	TGFB3
37194_at	0.00286	1.17589	GATA2
40560_at	0.00293	1.45815	TBX2
35822_at	0.00294	1.34377	CFB
31891_at	0.00298	1.09739	CHI3L2
37185_at	0.00301	1.19129	SERPINB2
35362_at	0.0031	1.52729	MYO10
36149_at	0.00315	1.72908	DPYSL3
34256_at	0.00318	1.02555	ST3GAL5
265_s_at	0.00323	1.81494	SELE
40705_at	0.00326	1.49308	RAPGEF3
1596_g_at	0.00328	1.01699	TEK
31514_at	0.00344	1.00561	DOK2
35261_at	0.00348	1.30048	GMFG
38278_at	0.00351	1.29514	ARID5A
36569_at	0.00373	1.04769	EXOSC7///CLEC3B
115_at	0.00373	1.63156	THBS1
35965_at	0.00385	1.505	HSPA6
39098_at	0.00394	1.70419	ELN
1165_at	0.00408	1.2626	IL18
1186_at	0.00425	1.10295	GDF10
33353_at	0.00427	1.10103	ADCY1
280_g_at	0.00434	1.22329	NR4A1
38288_at	0.00457	1.4573	SNAI2
34624_at	0.00462	1.29513	CDKN2B
182_at	0.00483	1.17931	ITPR3
1519_at	0.00518	1.44333	ETS2
33253_at	0.0052	1.21889	TRIM14
37785_at	0.00525	1.36807	RND1
35702_at	0.00539	1.16423	HSD11B1
31845_at	0.00582	1.15328	ELF4
1745_at	0.00586	1.32517	RET
36521_at	0.00635	1.12238	DZIP1
2002_s_at	0.0064	1.32315	BCL2A1
37906_at	0.00711	1.07541	LTBP2
34335_at	0.00711	1.13101	EFNB2
39069_at	0.00736	1.54519	AEBP1
36069_at	0.00795	1.09362	SRGAP2C///SRGAP2B///SRGAP2
33139_s_at	0.00833	1.2134	MLF1
1927_s_at	0.00852	1.12326	ACVRL1
39528_at	0.00864	1.12996	RRAD
1337_s_at	0.00876	1.06238	RARA
40312_at	0.00907	1.13922	DACH1
35333_r_at	0.0091	1.33159	IL33
40968_at	0.00929	1.05604	SOCS3
33163_r_at	0.0097	1.08114	GCLM
36067_at	0.0101	1.26273	CCL19
40230_at	0.0107	1.89161	FRZB
33267_at	0.0114	1.01133	ATP8A1
38006_at	0.0117	1.51266	CD48
38026_at	0.0117	1.29226	FBLN1
41572_r_at	0.0117	1.00004	REL
33121_g_at	0.0119	1.33574	RGS10
39250_at	0.012	1.16184	NOV
31886_at	0.0128	1.04702	NT5E
1573_at	0.0132	1.02785	PDGFB
32770_at	0.0133	1.56349	SEC24D
37892_at	0.0135	2.02231	COL11A1
40216_at	0.0138	1.08555	TRAF3IP1
37393_at	0.0141	1.18732	HES1
36095_at	0.0142	1.10279	CLIP3
32605_r_at	0.0144	1.03336	RAB1A
40425_at	0.0145	1.14241	EFNA1
33598_r_at	0.0148	1.17929	NLRP3
40583_at	0.0151	1.08139	PTPRJ
31938_g_at	0.0152	1.11715	KIAA0430
32640_at	0.0155	1.33974	ICAM1
1491_at	0.0171	1.38083	PTX3
40923_at	0.0172	1.06445	SLC36A1
38800_at	0.0173	1.93818	STMN2
34818_at	0.0174	1.15559	ETV5
41819_at	0.0175	1.12054	FYB
34476_r_at	0.0176	1.08121	EREG
38172_at	0.0177	1.06483	CBR3
34930_at	0.0185	1.02614	GPR65
41239_r_at	0.0187	1.52516	CTSS
33925_at	0.0188	1.23522	NRGN
658_at	0.0197	1.09441	THBS2
38422_s_at	0.0199	1.1312	FHL2
35740_at	0.0211	1.0941	EMILIN1
32317_s_at	0.0215	1.156	SLX1B-SULT1A4///SLX1A-SULT1A3///SULT1A4///SULT1A3///SULT1A1///SULT1A2
36533_at	0.0239	1.22927	PTGIS
36197_at	0.0247	1.24988	CHI3L1
40518_at	0.0256	1.05754	PTPRC
41748_at	0.0275	1.112	TNNC2
39319_at	0.0288	1.10719	LCP2
36782_s_at	0.0301	1.47146	INS-IGF2///IGF2
35012_at	0.0325	1.45633	MNDA
34470_at	0.0329	1.09134	TFEC
35927_r_at	0.0366	1.25424	LILRB1
35250_at	0.0383	1.05406	RNF24
39320_at	0.039	1.0401	CASP1
36983_f_at	0.0394	1.20709	HP
37523_at	3.7e-09	-1.07444	ACADL
31531_g_at	1.54e-08	-1.16329	ACACB
39522_at	3.91e-07	-1.03519	PFKFB3
39325_at	1.6e-06	-2.36369	LEFTY1///LEFTY2
40522_at	1.86e-06	-1.25205	GLUL
32676_at	1.97e-06	-1.1806	ALDH6A1
41219_at	6.32e-06	-1.99267	AHSA2
35834_at	1.96e-05	-2.61719	AZGP1
38156_at	9.46e-05	-1.12943	MDFI
32023_at	0.000121	-1.25408	ZNF391
35829_at	0.000173	-1.03546	CADM1
35196_at	0.000174	-1.56058	PLAA
36026_at	0.000189	-1.95192	PGAM2
37075_at	0.000376	-1.33437	SNTB1
37624_at	0.000398	-2.90158	CA3
34674_at	0.00048	-1.66949	S100A1
35904_at	0.000484	-1.05594	SLC10A2
37634_at	0.000536	-1.65726	PAEP
40551_at	0.000563	-1.55928	SPTBN1
35064_at	0.0011	-1.0729	TRIM31
261_s_at	0.00131	-1.16719	APOB
40502_r_at	0.00132	-2.09712	MYBPC1
33189_at	0.00216	-1.22199	LOC143286
35528_at	0.00227	-1.13181	WIPF1
169_at	0.00239	-1.01278	CDX1
31741_at	0.00242	-1.66559	PAX4
36824_at	0.00316	-1.28844	ASTN1
34980_at	0.00346	-1.1389	KDM4C
35430_at	0.00353	-1.61792	MED6
31650_g_at	0.00373	-1.03309	KIF25-AS1
39297_at	0.00415	-1.41839	MIR548F5///MAB21L1
975_at	0.00467	-1.08399	PLK4
41252_s_at	0.00521	-1.28848	PLEKHB2
40653_at	0.00644	-1.08725	RGS7
41740_at	0.00645	-1.04566	ARL3
35428_g_at	0.00689	-1.31311	DRC3
39203_at	0.00731	-1.04183	C14orf132
37206_at	0.00741	-1.01526	ADH6
37485_at	0.00785	-1.61266	SLC27A2
34580_at	0.00795	-1.00062	OPRD1
33721_at	0.009	-1.14244	ABCC2
35977_at	0.00905	-1.25343	DKK1
31885_at	0.00994	-1.06298	PTPN3
32381_at	0.0103	-1.15923	RORB
40952_at	0.0112	-1.19551	SNX29P2
35069_at	0.0118	-1.13164	PRAMEF14///PRAMEF2///PRAMEF1
35086_at	0.012	-1.04684	SSUH2
33669_at	0.0121	-1.13164	RFX4
1921_at	0.0122	-1.08114	RASGRF1
41081_at	0.0132	-1.31613	BUB1
37816_at	0.014	-1.07546	C5
37702_at	0.0142	-1.17874	CUL3
34909_at	0.0143	-1.13666	PHTF2
31435_at	0.0147	-1.10178	ADAM7
35470_at	0.0157	-1.12011	HTR2A
32089_at	0.017	-1.2634	SPAG6
40796_at	0.0172	-1.29575	TTN-AS1
32461_f_at	0.0182	-1.0105	ZNF81
38247_at	0.0187	-1.12826	F2RL1
37058_at	0.0217	-1.19857	UGT2B4
32927_at	0.0239	-1.1557	GIMAP1-GIMAP5///GIMAP5
37207_at	0.0262	-1.09753	SERPINA7
1534_at	0.0287	-1.00948	IL12RB2
38734_at	0.0296	-1.145	PLN
38917_at	0.0305	-1.3097	YME1L1
40871_at	0.0305	-1.10207	VHL
37115_at	0.0307	-1.09207	ZMYND8
35458_r_at	0.0318	-1.615	ABCB10
38163_at	0.0375	-1.10068	RIMS2
37426_at	0.0403	-1.21216	TOX3
31542_at	0.0415	-1.02399	FLG
39494_at	0.044	-1.25627	GTF2H2
41774_at	0.0465	-1.12753	ARL4D
32125_at	0.0472	-1.04852	THOC2
40572_at	0.0473	-1.02821	AAK1
ID refers to a unique transcript and was given by XXX chip annotation.
Notes:The yellow mark shows that genes are affiliated with the significantly associated CpG sites in meta-analysis.
Abrevation: SAT,subcutaneous adipose tissue; P,P value; logFC,log Fold Change.
p value less than or equal to 0.05.

## Sheet: Supplementary Table 3
Supplementary Table 3.Differential gene expression in VAT of obesity patients (GSE88837)
ID	P	log2FC	Gene.symbol
219054_at	1.52e-07	2.76996	NPR3
223316_at	1.34e-06	2.07383	CCDC3
201468_s_at	9.42e-06	1.72651	NQO1
223063_at	1.09e-05	1.43522	C1orf198
1552388_at	1.31e-05	1.18717	FLJ30901///SCUBE1
227419_x_at	1.91e-05	1.63131	PLAC9
213281_at	2.37e-05	1.76269	JUN
201235_s_at	4.07e-05	1.51125	BTG2
1560826_at	4.62e-05	1.81267	LOC101929398
209894_at	5.5e-05	1.52644	LEPROT///LEPR
200666_s_at	6.77e-05	1.42484	DNAJB1
200799_at	7.02e-05	1.19154	HSPA1B///HSPA1A
200800_s_at	7.17e-05	1.61308	HSPA1L///HSPA1B///HSPA1A
209283_at	9.97e-05	1.4445	CRYAB
203752_s_at	0.000121	1.16076	JUND
202388_at	0.000126	1.62393	RGS2
229580_at	0.000129	2.53752	CLSTN2
209521_s_at	0.000145	1.25062	AMOT
225557_at	0.000161	2.26738	CSRNP1
207558_s_at	0.000189	2.06379	PITX2
204621_s_at	0.000203	2.92111	NR4A2
1552365_at	0.000216	2.09323	SCIN
227404_s_at	0.000227	2.40526	EGR1
201387_s_at	0.000234	1.62947	UCHL1
201041_s_at	0.000235	1.99939	DUSP1
206334_at	0.000238	4.03819	LIPF
220065_at	0.000256	2.93995	TNMD
202340_x_at	0.000287	3.45245	NR4A1
222449_at	0.000301	1.07359	PMEPA1
221841_s_at	0.000303	1.5983	KLF4
230943_at	0.000326	1.72406	SOX17
213560_at	0.000326	1.85155	GADD45B
216834_at	0.000329	2.86224	RGS1
219926_at	0.000363	4.52038	POPDC3
225972_at	0.000372	1.06688	TMEM64
202768_at	0.00039	4.10756	FOSB
203811_s_at	0.000401	1.4016	DNAJB4
1553530_a_at	0.000452	1.02213	ITGB1
206932_at	0.000467	2.45679	CH25H
1553329_at	0.000478	1.4077	SSMEM1
221031_s_at	0.00048	2.07048	APOLD1
1567030_at	0.000483	1.79562	SH3GL1P2
229125_at	0.000545	1.35066	KANK4
201531_at	0.000549	2.08684	ZFP36
209343_at	0.000635	1.14853	EFHD1
231334_at	0.000657	1.33814	LOC101929480
222919_at	0.00067	4.60365	TRDN
202672_s_at	0.000732	2.64779	ATF3
244111_at	0.000738	1.29233	KRT222
1568768_s_at	0.000797	2.3579	BRE-AS1
207586_at	0.000808	1.02177	SHH
1557534_at	0.000815	5.01929	LOC339862
207977_s_at	0.00101	1.55078	DPT
1562274_at	0.00103	5.98011	LOC101928446
239935_at	0.00104	5.78349	MDGA2
205018_s_at	0.00104	1.11522	MBNL2
1563107_at	0.0011	5.00338	LOC101927843
218469_at	0.00125	1.67458	GREM1
213265_at	0.00129	2.09081	PGA4///PGA3///PGA5
210298_x_at	0.0013	1.2977	FHL1
243813_at	0.00136	2.22262	LINC00968
226018_at	0.0015	1.17457	MTURN
1562892_at	0.00151	1.04622	CHCHD5
205499_at	0.00154	1.3775	SRPX2
217115_at	0.00161	1.18823	MKRN7P
207092_at	0.00162	1.56605	LEP
229667_s_at	0.00167	1.53492	HOXB8
209616_s_at	0.00171	1.71982	LOC100653057///CES1
205440_s_at	0.00173	1.79289	NPY1R
201108_s_at	0.00175	1.46245	THBS1
1553873_at	0.0018	4.22686	KLHL34
228347_at	0.00181	1.65382	SIX1
213568_at	0.00195	1.20451	OSR2
204753_s_at	0.00196	1.71326	HLF
208078_s_at	0.00199	2.06673	SIK1
1558212_at	0.00202	1.52862	LOC101930053///LOC101930048///VLDLR-AS1
1556421_at	0.00205	1.54549	C8orf34-AS1
224528_s_at	0.00207	4.47803	KCNIP2
206115_at	0.00208	2.17268	EGR3
1555413_s_at	0.00216	3.59396	FBXL21
219773_at	0.00228	1.20043	NOX4
210875_s_at	0.00233	1.15653	ZEB1
241482_at	0.00244	4.30403	EPHA1
205249_at	0.00247	3.5269	EGR2
219371_s_at	0.00254	1.1185	KLF2
203337_x_at	0.00258	1.63749	ITGB1BP1
1552853_at	0.00261	4.09762	VWA5B1
238752_at	0.00262	1.3673	GPLD1
228360_at	0.00266	2.50769	LYPD6B
214071_at	0.0027	1.095	GNAL
202037_s_at	0.00276	1.21918	SFRP1
209074_s_at	0.00278	1.3671	FAM107A
206842_at	0.0028	1.757	KCND1
206614_at	0.00297	2.02832	GDF5
205239_at	0.00308	2.70401	AREG
215918_s_at	0.00309	1.46931	SPTBN1
207400_at	0.00311	1.50975	NPY5R
234705_at	0.00315	3.93213	CATX-1
231672_at	0.00321	1.48026	LOC100653086
220869_at	0.00321	1.81338	UBA6
1564796_at	0.00325	1.63377	EMP1
209692_at	0.00329	1.08714	EYA2
242360_at	0.00337	1.14769	LDB2
209774_x_at	0.00343	2.39504	CXCL2
201473_at	0.00347	1.68725	JUNB
227198_at	0.00349	1.31754	AFF3
242313_at	0.00355	1.05047	LOC728730
219509_at	0.00355	1.47465	MYOZ1
214883_at	0.00357	3.67373	THRA
223670_s_at	0.00359	1.81598	HEMGN
229306_at	0.00366	1.51744	C2CD4B
211119_at	0.00379	4.44018	ESR2
201289_at	0.0038	1.96758	CYR61
1555533_at	0.00381	1.36664	QRFPR
214407_x_at	0.00388	1.23612	GYPB
218711_s_at	0.00389	1.09535	SDPR
203821_at	0.004	1.32982	HBEGF
235317_at	0.00414	1.31788	MIR24-2///MIR23A///LOC284454
214040_s_at	0.00463	1.30665	GSN
206694_at	0.00473	3.80576	PNLIPRP1
217996_at	0.00475	1.56184	PHLDA1
231104_at	0.00482	4.96742	TDRD5
205404_at	0.00483	1.5357	HSD11B1
211552_s_at	0.0049	1.03409	ALDH4A1
1557493_x_at	0.00492	2.8342	LOC100240728
227006_at	0.00495	1.0949	PPP1R14A
1558028_x_at	0.00497	1.10309	NORAD
205261_at	0.00505	1.34108	PGC
204424_s_at	0.00509	1.39798	LMO3
210896_s_at	0.00517	1.05408	ASPH
209189_at	0.00521	3.86835	FOS
236710_at	0.00561	3.36286	C1orf87
229991_s_at	0.00569	1.91906	SYTL4
206439_at	0.00576	1.22731	EPYC
36829_at	0.00582	1.21629	MIR6883///PER1
225915_at	0.00583	1.14715	CAB39L
233059_at	0.00588	3.04191	KCNJ3
202206_at	0.00592	1.20236	ARL4C
216048_s_at	0.0061	1.09215	RHOBTB3
226461_at	0.00615	1.10382	HOXB9
237719_x_at	0.00635	1.23297	RGS7BP
223467_at	0.00637	1.37056	RASD1
241564_at	0.00671	4.09075	GLOD5
228325_at	0.00676	1.26537	SPIDR
202014_at	0.00681	1.11714	PPP1R15A
203543_s_at	0.00686	1.18625	KLF9
206012_at	0.00686	1.58595	LEFTY1///LEFTY2
227566_at	0.00689	1.3647	LOC102725271///NTM
212224_at	0.00695	1.20537	ALDH1A1
1555240_s_at	0.00696	1.10479	GNG12
206349_at	0.00703	5.45516	LGI1
216979_at	0.00705	1.79863	NR4A3
218863_s_at	0.00706	1.83784	TNS1
1561699_a_at	0.00708	3.77687	ATP11A-AS1
31637_s_at	0.00709	1.44768	NR1D1///THRA
222725_s_at	0.00716	1.48734	PALMD
210398_x_at	0.00723	4.76526	FUT6
228263_at	0.00724	1.10112	GRASP
225815_at	0.00738	1.0936	CPLX2
1555854_at	0.00739	1.19402	LOC101930400///AKR1C2///AKR1C1
233057_at	0.00749	1.32072	HSPB8
217028_at	0.00751	1.44243	CXCR4
1563655_at	0.00754	3.06578	TNNT2
205608_s_at	0.0076	1.44446	ANGPT1
219737_s_at	0.00768	1.04777	PCDH9
236758_at	0.00779	3.94743	LOC100132304///LINC00684
210503_at	0.00782	3.72242	MAGEA11
1556267_at	0.00783	2.51139	MYRFL
209183_s_at	0.00789	1.09983	C10orf10
204595_s_at	0.00794	1.53501	STC1
211108_s_at	0.00803	3.72478	JAK3
205207_at	0.00805	2.59354	IL6
244725_at	0.00842	4.53905	DMRTA1
202150_s_at	0.00845	1.17094	NEDD9
227697_at	0.00852	1.92026	SOCS3
205419_at	0.00864	1.13021	GPR183
222596_s_at	0.00864	3.31853	LGR4
219841_at	0.00864	2.95445	AICDA
209822_s_at	0.00866	1.19176	VLDLR
206204_at	0.00871	1.22394	GRB14
243106_at	0.00884	2.55001	CLEC12A
1552715_a_at	0.00897	3.42622	RXFP1
236457_at	0.009	1.36071	GTDC1
230309_at	0.00912	1.20214	BHMT2
211751_at	0.00925	3.54013	LOC101930416///LOC101929792///LOC100996724///LOC653513///PDE4DIP
231562_at	0.0101	2.43386	APOC2
226932_at	0.0101	1.04974	SSPN
204051_s_at	0.0102	1.43229	SFRP4
1553243_at	0.0103	1.05943	ITIH5
1554203_at	0.0104	2.38625	GRIK1-AS1
1552338_at	0.0106	2.70658	GSC
208483_x_at	0.011	3.92832	KRT33A
205413_at	0.011	1.04947	MPPED2
1559634_at	0.011	2.2329	CHRM3
230876_at	0.0111	1.0745	ZNF883
230956_at	0.0111	1.05583	COLCA1
1553542_at	0.0115	2.94258	CCDC125
1555445_at	0.0117	3.338	CA8
221045_s_at	0.0117	1.1918	PER3
1562596_at	0.0121	3.75659	LINC00437
213167_s_at	0.0123	2.96238	SLC5A3
212560_at	0.0125	1.40054	SORL1
214832_at	0.0129	2.98285	HNF4A
243296_at	0.013	1.42979	NAMPT
1552988_at	0.0131	1.28434	C11orf65
206282_at	0.0132	3.29429	NEUROD1
227285_at	0.0132	1.0668	CIART
222100_at	0.0135	1.73645	CYP2E1
214065_s_at	0.0139	2.58585	CIB2
208607_s_at	0.014	1.28512	SAA2-SAA4///SAA2///SAA1
220648_at	0.0143	5.45805	ADARB2
225212_at	0.0147	1.17255	SLC25A25
238977_at	0.0148	1.36123	MCM6
243208_x_at	0.0149	2.60164	ACTL9
227734_s_at	0.0151	3.17233	ZNHIT2
231626_at	0.0153	3.21472	TPH1
236396_at	0.0157	1.04226	LOC101927263
222226_at	0.0157	2.17134	SAA3P
221337_s_at	0.0157	2.18516	LOC101928551///ADAM29
206073_at	0.0159	1.49904	COLQ
1555396_s_at	0.016	3.75816	CXorf67
1557849_at	0.0161	3.00825	LOC105377421
223935_at	0.0163	2.49586	TRPM5
224657_at	0.0166	1.09758	ERRFI1
1557161_at	0.0166	3.15685	LOC100132735
227115_at	0.0168	1.40852	LOC100506870///LOC283140
222926_at	0.0171	4.2169	DCDC2
238433_at	0.0171	2.9494	SNX5
208214_at	0.0173	1.97643	ADRB1
206359_at	0.0175	3.37548	SOCS3
239517_at	0.0177	2.40335	LOC100505984///ITGB6
235868_at	0.0178	2.00539	MGEA5
224540_at	0.0178	3.92278	LACRT
1560383_at	0.0184	1.9608	LOC101928658
209840_s_at	0.0185	1.25815	LRRN3
239198_at	0.0186	1.56889	EZH1
1562054_at	0.0186	3.98342	PPP4R3CP
241822_at	0.0187	1.96938	SIX5
1566134_at	0.0189	1.13423	CARHSP1
208426_x_at	0.0192	2.92821	KIR2DL4
210391_at	0.0192	2.56616	NR6A1
1553629_a_at	0.0193	3.92073	FAM71B
230763_at	0.0193	3.04944	SPATA17
209101_at	0.0197	1.1296	CTGF
214577_at	0.0204	1.93401	MAP1B
1561345_at	0.0207	1.6528	LOC101928009
215045_at	0.0209	2.83384	CELF3
235666_at	0.0211	1.0951	ITGA8
220727_at	0.0214	1.10371	KCNK10
227099_s_at	0.0216	1.15867	C11orf96
225894_at	0.0217	1.09084	SYNPO2
235496_at	0.022	1.0798	HRCT1
208053_at	0.0222	2.24151	GUCY2F
216641_s_at	0.0223	2.02127	LAD1
1561041_at	0.0224	3.41771	TNRC6C
1554875_at	0.0225	3.61099	CAMKMT
236038_at	0.0226	1.06956	RNF150
1570115_at	0.0227	2.46348	PP12708
232534_at	0.0227	2.22725	LIN37
205960_at	0.0229	1.3567	PDK4
220464_at	0.023	1.22045	MCF2L
205258_at	0.023	1.0243	INHBB
212713_at	0.0231	1.64331	MFAP4
206742_at	0.0233	1.10062	PIR-FIGF///FIGF
210931_at	0.0233	2.13621	RNF6
1555417_a_at	0.0234	2.1973	TAS1R1
237248_at	0.0234	2.39817	PDE11A
216760_at	0.0235	4.34348	HRASLS2
205935_at	0.0246	1.898	FOXF1
209457_at	0.0246	1.28249	DUSP5
1568728_s_at	0.0247	1.16249	RNF207
237872_at	0.0253	2.62818	LOC102725454
238461_at	0.0254	2.78205	EIF4E3
216956_s_at	0.0255	1.7479	ITGA2B
1554378_a_at	0.0257	1.12765	PDE1C
211560_s_at	0.0257	3.23568	ALAS2
1555647_a_at	0.026	2.38917	FOXP2
224131_at	0.026	2.80919	HCAR1
231380_at	0.026	1.30228	C8orf34
1553057_at	0.0264	2.61377	SERPINB12
1553713_a_at	0.0264	2.27845	RHEBL1
211520_s_at	0.0265	2.29035	GRIA1
238245_at	0.0267	1.94859	ENPP7
244025_at	0.027	2.73029	ITPRIP
244121_at	0.0271	2.1163	UBR3
205966_at	0.0272	1.60051	TAF13
234899_at	0.0273	2.72683	H2BFM
237537_at	0.0273	2.39532	LINC01360
36711_at	0.0273	1.13091	MAFF
1553521_at	0.0274	2.66263	DEFB104B///DEFB104A
1554635_a_at	0.0288	4.24463	NPAS3
219586_at	0.0293	2.91506	WDR59
1563659_at	0.0293	1.73033	HERC6
232265_at	0.0296	2.79131	ATXN7L1
1567179_at	0.0296	3.25555	LOC105376944
242137_at	0.0297	1.48433	RBMS3
217060_at	0.0298	1.15	TRBV16
217425_at	0.0303	3.23092	MC2R
216517_at	0.0303	2.99052	IGKC
1568941_a_at	0.0306	3.0745	HNRNPC
243075_at	0.0309	2.19537	ZNF316
202431_s_at	0.0311	1.0064	MYC
231762_at	0.0311	2.50705	FGF10
234849_at	0.0311	3.36989	YME1L1
209807_s_at	0.0311	1.89589	NFIX
236421_at	0.0313	1.82105	ANKRD45
217075_x_at	0.0315	3.13216	KMT2B
215119_at	0.0315	1.95822	MYO16
1559412_at	0.0316	2.41277	MIR99AHG
229196_at	0.0317	2.99311	FAM111A
220624_s_at	0.0319	3.64103	ELF5
223185_s_at	0.0321	1.08905	BHLHE41
207251_at	0.0325	2.17434	MEP1B
215889_at	0.033	2.49096	SKIL
206064_s_at	0.0331	1.88875	PPIL2
1557776_at	0.0335	1.311	LOC101928303
210155_at	0.0335	1.55056	MYOC
239508_x_at	0.0339	1.61943	CFAP65
1553138_a_at	0.0339	2.29031	ANKLE1
1569693_at	0.0339	3.50956	BTBD8
233979_s_at	0.0343	3.08572	ESPN
206930_at	0.0344	1.27176	GLYAT
243562_at	0.0345	2.0406	KNG1
244194_at	0.0348	1.57413	ADAM22
1554739_at	0.0349	2.04376	IPP
1557544_at	0.0351	1.58507	CFAP58
210382_at	0.0353	1.87867	SCTR
1558778_s_at	0.0353	2.10414	MKL2
242508_at	0.0354	1.25489	USF3
1569102_at	0.0357	2.69855	ABCA4
221282_x_at	0.036	2.69627	RUNX2
241716_at	0.0366	3.15972	HSPD1
209750_at	0.0367	1.753	NR1D2
208589_at	0.0367	2.64976	TRPC7
202499_s_at	0.0374	1.19244	SLC2A3
1554660_a_at	0.0382	1.86049	CNST
213962_s_at	0.0384	2.89205	ANKLE2
1558683_a_at	0.0384	1.90557	HMGA2
205883_at	0.0384	1.13485	ZBTB16
220889_s_at	0.0385	2.05445	CA10
240206_at	0.0385	1.8436	TARS
237154_at	0.0391	1.00574	LOC101930114
204111_at	0.0392	2.12611	HNMT
1565556_at	0.0394	1.23546	LINC00628
220447_at	0.0397	3.39318	HRH3
1560286_s_at	0.0397	1.59051	LOC101928955
205954_at	0.0398	1.98162	RXRG
227989_at	0.0398	1.80422	LTBP4
216307_at	0.0399	2.42385	DGKB
229118_at	0.0402	2.21446	PRRG3
1556551_s_at	0.0404	2.0004	SLC39A6
214971_s_at	0.0404	2.03461	ST6GAL1
222486_s_at	0.0405	1.08299	ADAMTS1
1560485_at	0.0406	1.83979	HIVEP1
208443_x_at	0.0407	2.73087	SHOX2
1569486_at	0.0408	2.5388	LOC101928401
203850_s_at	0.0414	2.18371	KIF1A
233934_at	0.0415	2.35946	MIR490///LOC349160
233379_at	0.0415	1.95284	PRR5L
34471_at	0.0417	2.28814	MYH8
1560279_a_at	0.0419	1.57449	LOC221122
243251_at	0.042	1.83313	LOC101929719
209904_at	0.042	2.13844	TNNC1
216778_s_at	0.0423	2.3989	CYLC1
222315_at	0.0424	2.56218	LOC100996756
1559264_at	0.0424	2.76308	LACTB2-AS1
1568919_at	0.0427	3.36599	LINC01492
1554676_at	0.043	2.46843	SRGN
229782_at	0.0438	2.61765	RMST
1560934_at	0.0438	2.04569	LOC284669
239822_at	0.0439	2.17412	LINC01354
1553089_a_at	0.0439	1.57322	WFDC2
1562491_at	0.0443	3.29364	LOC101928622
1565544_at	0.0444	1.95091	RNF141
232411_at	0.0445	3.08957	KCNJ6
220806_x_at	0.0445	2.6428	GNG13
229245_at	0.0446	2.523	PLEKHA6
232479_at	0.0449	1.74792	FERMT1
236973_at	0.0449	2.39662	LOC100131662
237170_at	0.0451	2.55443	LOC100507384
206806_at	0.0451	2.41469	DGKI
230500_at	0.0456	1.9574	PDE7A
223149_s_at	0.0457	2.26674	PTPN23
1555265_at	0.0458	1.07352	ABCC13
1558411_at	0.046	1.02877	EGFEM1P
222088_s_at	0.0462	1.23022	SLC2A14///SLC2A3
207003_at	0.0466	2.00103	GUCA2A
216669_at	0.047	2.07368	PDSS2
1562919_at	0.0472	2.9376	FAM45A
1560656_at	0.0473	1.78273	LOC101928327
230891_at	0.0474	1.1939	TUBE1
215857_at	0.0477	2.06465	NCLN
206754_s_at	0.0478	2.43529	CYP2B7P///CYP2B6
216987_at	0.048	3.50407	IRF4
239010_at	0.0483	2.48376	DUXAP10
1560197_at	0.0489	1.41966	ZC2HC1A
210614_at	0.049	1.97186	TTPA
237053_at	0.0491	1.93921	SYNDIG1L
237250_at	0.0493	2.98086	GABRA2
205563_at	0.0495	2.13731	KISS1
211657_at	0.0495	1.70928	CEACAM6
226482_s_at	0.0496	1.55162	TSTD1
220573_at	0.0497	2.77705	KLK14
238770_at	0.0497	2.84364	KIAA1456
234392_at	0.0498	2.70226	HIST1H4PS1
240209_at	0.0499	1.42939	C16orf78
1555269_a_at	0.0499	1.41586	ANO1
203576_at	1.65e-05	-1.02645	BCAT2
203649_s_at	6.4e-05	-2.83805	PLA2G2A
209824_s_at	0.00019	-1.44662	ARNTL
206697_s_at	0.000283	-3.73894	HP
201042_at	0.000345	-1.35373	TGM2
212489_at	0.00038	-1.05844	COL5A1
203382_s_at	0.000389	-1.94079	APOE
211162_x_at	0.000467	-2.74123	SCD
202357_s_at	0.000518	-2.77446	CFB
218434_s_at	0.000538	-1.55874	AACS
225293_at	0.000556	-1.1791	COL27A1
208964_s_at	0.000582	-1.32715	MIR1908///FADS1
1553972_a_at	0.000787	-1.49911	CBS
242341_x_at	0.000812	-1.16596	GLYCTK
215388_s_at	0.000847	-1.33873	CFHR1///CFH
221731_x_at	0.000901	-1.12821	VCAN
204256_at	0.00119	-2.01978	ELOVL6
212282_at	0.00125	-1.04138	TMEM97
205243_at	0.00127	-1.25915	SLC13A3
212921_at	0.0013	-1.00022	SMYD2
206102_at	0.00139	-1.4185	GINS1
213693_s_at	0.00144	-1.62615	MUC1
229378_at	0.0016	-1.20755	STOX1
208470_s_at	0.00161	-3.33039	HPR///HP
235741_at	0.00163	-4.67185	PPIA
229802_at	0.00182	-2.08134	WISP1
205858_at	0.00182	-2.20955	NGFR
226814_at	0.00186	-1.06836	ADAMTS9
206910_x_at	0.00194	-1.31921	CFHR2
220664_at	0.00201	-4.92843	SPRR2C
209267_s_at	0.00207	-1.97681	SLC39A8
219118_at	0.00209	-1.26547	FKBP11
230913_at	0.0021	-1.12334	ABCG1
233304_at	0.00214	-1.15485	NFIB
209930_s_at	0.00231	-2.96603	NFE2
237168_at	0.00244	-2.8602	NEK5
219403_s_at	0.00282	-1.11396	HPSE
219249_s_at	0.00285	-1.33844	FKBP10
218585_s_at	0.00286	-1.7489	DTL
203240_at	0.00291	-1.49393	FCGBP
206210_s_at	0.0031	-4.54067	CETP
207804_s_at	0.00313	-1.42685	FCN2
218755_at	0.00315	-5.22494	KIF20A
205320_at	0.00323	-1.33631	APC2
238721_at	0.00327	-1.32993	MDH1B
214428_x_at	0.00344	-2.24874	C4B_2///C4B///C4A
216950_s_at	0.00373	-2.47766	FCGR1CP///FCGR1B///FCGR1A
204430_s_at	0.00384	-3.0262	SLC2A5
201666_at	0.00386	-1.55849	TIMP1
220333_at	0.0039	-4.38491	PAQR5
213553_x_at	0.00391	-1.70785	APOC1
238914_at	0.00393	-4.34864	DCC
236534_at	0.00408	-3.58253	BNIPL///C1orf56
204865_at	0.00441	-2.4042	CA3
203476_at	0.00452	-1.1568	TPBG
202936_s_at	0.00483	-1.01192	SOX9
201127_s_at	0.00499	-1.04635	ACLY
207681_at	0.005	-3.48488	CXCR3
226560_at	0.00511	-2.32	SGPP2
1565740_at	0.00513	-2.94296	ACACB
205640_at	0.00526	-1.4743	ALDH3B1
204822_at	0.0053	-3.21263	TTK
209125_at	0.0053	-3.66249	KRT6A
214164_x_at	0.00551	-1.37124	CA12
224940_s_at	0.00552	-1.1488	PAPPA
235927_at	0.00553	-1.20167	XPO1
204510_at	0.00563	-1.18686	CDC7
205952_at	0.00568	-2.26356	KCNK3
219454_at	0.00569	-3.18887	EGFL6
237159_x_at	0.00573	-3.27935	AP1S3
1552626_a_at	0.00586	-1.00535	TMEM163
217767_at	0.00607	-1.10648	C3
1553169_at	0.00609	-3.56707	LRRN4
213380_x_at	0.00613	-1.73575	LOC102724562///MST1L///MST1P2///MST1
222776_at	0.00624	-1.00444	MAGOHB
205866_at	0.00629	-1.39547	FCN3
231415_at	0.00649	-2.93775	WBSCR22
1562442_a_at	0.00655	-3.15497	SSBP1
242943_at	0.00655	-1.03071	ST8SIA4
214913_at	0.00672	-1.30676	ADAMTS3
220177_s_at	0.00683	-4.16512	TMPRSS3
228635_at	0.00684	-3.0961	PCDH10
1569344_a_at	0.00699	-3.42372	LOC105375172
215999_at	0.00714	-1.44793	CDRT1
207828_s_at	0.00715	-1.1712	CENPF
239860_at	0.00718	-2.73163	LOC100130232
205455_at	0.00731	-1.27021	MST1R
212218_s_at	0.00757	-1.46226	FASN
214358_at	0.00775	-1.11682	ACACA
228806_at	0.00787	-1.63843	RORC
206244_at	0.00808	-4.11408	CR1
204927_at	0.00809	-1.17076	RASSF7
238273_at	0.00811	-1.11394	LOC101930655///C7orf73///SLC13A4
236725_at	0.00818	-2.90379	WWC1
213008_at	0.0082	-1.21458	FANCI
242884_at	0.00821	-3.68547	LOC440570
231678_s_at	0.00821	-3.88023	ADH4
239178_at	0.00824	-2.30415	FGF9
1559459_at	0.00844	-3.3656	LOC613266
221470_s_at	0.00862	-2.16461	IL37
238406_x_at	0.00882	-1.11713	SEZ6L2
237659_at	0.00904	-1.47865	FLJ40288
211739_x_at	0.00938	-1.17194	GH1///CSHL1///CSH2///CSH1
221360_s_at	0.00947	-3.37104	GHSR
234990_at	0.00961	-2.00899	CBX5
209837_at	0.00966	-1.19061	AP4M1
224226_at	0.01	-2.61985	PKD2L2
222560_at	0.0101	-3.01233	LANCL2
226670_s_at	0.0101	-1.07524	PABPC1L
201596_x_at	0.0102	-2.13344	KRT18
219573_at	0.0103	-1.04165	CARMIL1
225372_at	0.0104	-1.00504	C10orf54
206885_x_at	0.0104	-1.2949	GH1
232458_at	0.0104	-1.42371	COL3A1
1567559_s_at	0.0106	-3.29367	TREML4
202508_s_at	0.0109	-3.31079	SNAP25
216320_x_at	0.0109	-1.90833	MST1
239381_at	0.0109	-1.9635	KLK7
227862_at	0.0112	-1.21226	TRNP1
231511_at	0.0113	-1.68243	FRAS1
238364_x_at	0.0114	-1.4155	GLI4
1562234_a_at	0.0115	-2.80418	NAV3
228322_at	0.0116	-3.10894	NAA30
1559326_at	0.0116	-3.736	DIO3OS
209773_s_at	0.0117	-2.07866	RRM2
213338_at	0.0117	-2.99893	TMEM158
221898_at	0.0118	-1.49285	PDPN
1569078_at	0.0118	-2.80808	LOC100294362
1568933_at	0.0122	-3.43104	LYPD8
226187_at	0.0123	-1.08061	CDS1
1553043_a_at	0.0124	-2.76398	CD300LF
232201_at	0.0124	-1.69374	NKD2
213125_at	0.0126	-1.09523	OLFML2B
214591_at	0.0127	-1.81233	KLHL4
212274_at	0.0127	-1.04126	LPIN1
204533_at	0.0128	-1.29679	CXCL10
210099_at	0.0132	-2.065	ABCA2
231701_s_at	0.0132	-1.20848	SHMT1
219959_at	0.0136	-1.21968	MOCOS
234811_at	0.0137	-3.05137	CENPN
1557402_at	0.0137	-3.72592	ZKSCAN8
204851_s_at	0.0139	-3.13598	DCX
225655_at	0.0141	-1.13303	UHRF1
205568_at	0.0142	-1.61989	AQP9
212906_at	0.0142	-1.08853	GRAMD1B
222908_at	0.0142	-1.07115	PIEZO2
204409_s_at	0.0145	-2.26618	EIF1AY
218599_at	0.0147	-1.44951	REC8
219479_at	0.0147	-1.0144	KDELC1
226374_at	0.0147	-2.85862	CXADR
203868_s_at	0.0148	-1.00813	VCAM1
237995_at	0.0148	-2.93869	RIMBP2
203650_at	0.0149	-1.04893	PROCR
1570135_at	0.0149	-3.37174	ZNF230
202589_at	0.0149	-1.26737	TYMS
230125_at	0.015	-2.83722	GUSB
212314_at	0.015	-1.12048	SEL1L3
1558124_at	0.015	-4.04785	NUDCD2
209803_s_at	0.0152	-1.32698	PHLDA2
213060_s_at	0.0152	-2.25049	CHI3L2
216706_x_at	0.0152	-2.91186	SKAP2///IGHG1
214461_at	0.0153	-4.32998	LBP
214511_x_at	0.0153	-2.42842	FCGR1B
243984_at	0.0153	-1.86051	SCRG1
227860_at	0.0154	-1.09374	CPXM1
210957_s_at	0.0154	-2.12137	AFF2
243109_at	0.0155	-1.71064	MCTP2
233249_at	0.0156	-2.43152	LOC100507073
237428_at	0.0156	-2.39162	TEX43
228668_x_at	0.0156	-1.90005	CCDC71L
242187_s_at	0.0156	-2.40674	TNRC18
228320_x_at	0.0158	-2.97609	BICDL1
222809_x_at	0.016	-1.74687	CCDC85C
206787_at	0.016	-2.41754	BRDT
204007_at	0.0161	-1.23489	FCGR3B
220658_s_at	0.0161	-2.63917	ARNTL2
206658_at	0.0162	-2.16023	UPK3B
228955_at	0.0162	-2.64667	LRP8
237797_at	0.0163	-2.85081	DNM1L
217498_at	0.0164	-1.19341	GDF11
238584_at	0.0164	-3.92271	IQCA1
1558045_a_at	0.0165	-3.30021	LOC389906
231782_s_at	0.0166	-1.73708	KLK4
231041_at	0.0167	-2.25482	POLR1E
207165_at	0.0167	-1.25302	HMMR
1565585_at	0.0173	-2.9955	LOC101928968
203052_at	0.0173	-1.38702	C2
232764_at	0.0174	-2.8055	CCNB2
235572_at	0.0174	-3.03291	SPC24
209980_s_at	0.0175	-1.40485	MIR6778///SHMT1
212110_at	0.0175	-1.1323	SLC39A14
202503_s_at	0.0177	-1.85304	KIAA0101
205819_at	0.0178	-2.11294	MARCO
206065_s_at	0.0178	-1.84084	DPYS
228956_at	0.0182	-3.18977	UGT8
234946_at	0.0183	-1.58341	ENTPD6
202833_s_at	0.0184	-3.53762	SERPINA1
244409_at	0.0185	-2.83023	CCDC154
211232_x_at	0.0187	-2.75719	GLP1R
1560788_at	0.0188	-3.90857	MYO3B
204470_at	0.0189	-2.21324	CXCL1
244378_at	0.019	-1.03981	HECTD4
201292_at	0.019	-3.10906	TOP2A
232673_at	0.0193	-2.91411	LRRFIP2
1554793_at	0.0193	-1.33321	UBE3C
37512_at	0.0195	-2.91112	HSD17B6
229400_at	0.0197	-1.1791	HOXD10
237610_at	0.0197	-1.98149	LOC101929512
205531_s_at	0.02	-2.56703	GLS2
236186_x_at	0.02	-2.7618	IL17RE
1560556_a_at	0.0201	-2.69376	PLEKHA8
208208_at	0.0201	-2.67181	MYH13
218662_s_at	0.0202	-1.10429	NCAPG
234335_s_at	0.0202	-3.11506	FAM84A
1556606_at	0.0202	-1.03751	NAV2
1569124_at	0.0203	-3.5461	LRRC63
237591_at	0.0204	-1.17797	LINC00173
1561585_at	0.0205	-2.46217	RCBTB2
227350_at	0.0205	-1.84729	HELLS
203276_at	0.0207	-1.0083	LMNB1
1568795_at	0.0207	-2.72647	LOC105373495
206007_at	0.0209	-2.50422	PRG4
219313_at	0.0209	-2.82824	GRAMD1C
231200_at	0.0211	-2.34785	LSM14B
208341_x_at	0.0212	-2.55766	CSH2///CSH1
219956_at	0.0212	-2.14054	GALNT6
1563671_at	0.0212	-1.62018	LACE1
211207_s_at	0.0213	-2.14635	ACSL6
214467_at	0.0214	-1.78468	GPR65
230255_at	0.0214	-1.63055	GABRD
208131_s_at	0.0214	-1.14543	PTGIS
229952_at	0.0215	-2.35225	PLEKHG3
58916_at	0.0217	-1.12092	NDUFC2-KCTD14///KCTD14
219927_at	0.0217	-2.69209	FCF1
243392_at	0.0219	-4.34399	USP49
225165_at	0.022	-2.26522	PPP1R1B
208350_at	0.0223	-3.25436	CSN1S1
205227_at	0.0223	-1.94836	IL1RAP
206157_at	0.0223	-1.48734	PTX3
205439_at	0.0223	-1.89019	GSTT2
219695_at	0.0224	-2.75161	SMPD3
235412_at	0.0227	-2.03026	ARHGEF7
234421_s_at	0.023	-2.63626	EVC
1552506_at	0.0233	-2.87476	CRB2
221040_at	0.0234	-2.99869	CAPN10
202311_s_at	0.0235	-1.29147	COL1A1
238262_at	0.0235	-3.0824	SPDYA
1560752_at	0.0235	-2.13718	FBXW2
218039_at	0.0236	-1.90437	NUSAP1
203540_at	0.0236	-3.22611	GFAP
1559275_x_at	0.0241	-3.5152	ZNF732
228984_at	0.0241	-2.65578	CARNS1
1570119_at	0.0242	-2.79299	PDS5B
1554125_a_at	0.0243	-3.10032	NLGN4Y
204163_at	0.0244	-1.32043	EMILIN1
226129_at	0.0245	-1.58027	FAM83H
1563845_at	0.0249	-2.71722	LOC100507387///FAM153A///FAM153B
236597_at	0.0249	-1.83255	UGT3A1
227048_at	0.025	-1.56444	LAMA1
205936_s_at	0.025	-2.62177	HK3
1566289_at	0.0251	-2.84333	OR2M4
210728_s_at	0.0253	-2.28859	CALCA
1564150_a_at	0.0254	-3.29156	LINC01619
1564383_s_at	0.0254	-1.84115	FLJ35934
208069_x_at	0.0254	-1.67102	GH2///GH1///CSHL1///CSH1
215814_at	0.0255	-2.68834	DST
1554072_s_at	0.0256	-2.39622	DEUP1
208356_x_at	0.0257	-1.46507	GH1///CSHL1///CSH1
231961_at	0.0258	-1.36199	RBPMS
209016_s_at	0.0261	-2.73454	KRT7
207912_s_at	0.0262	-3.21905	DAZ4///DAZ2///DAZ3///DAZ1
235911_at	0.0269	-1.10244	MELTF
230947_at	0.0269	-2.47024	2018-09-12
224507_s_at	0.027	-3.36054	MGC12916
211870_s_at	0.027	-2.52763	PCDHA2///PCDHA3
1561342_at	0.0274	-2.30614	LOC150005
219522_at	0.0274	-2.11112	FJX1
1554988_at	0.0275	-3.40136	SLC9C2
1553374_at	0.0275	-2.17521	PRO2949
227002_at	0.0276	-1.00287	LOC101927137///FAM78A
211273_s_at	0.028	-3.33201	TBX1
221521_s_at	0.0282	-1.59011	GINS2
209008_x_at	0.0283	-1.61347	KRT8
1566324_a_at	0.0284	-1.13771	MAF
205710_at	0.0285	-2.95529	LRP2
1564790_at	0.0285	-2.79428	ST7-AS2
243313_at	0.0289	-2.29012	SYNPO2L
222739_at	0.0291	-3.2771	TMEM62
241118_at	0.0291	-1.81966	LINC00462
203358_s_at	0.0292	-1.31456	EZH2
240703_s_at	0.0292	-1.61806	HERC1
224428_s_at	0.0294	-2.02514	CDCA7
238411_x_at	0.0297	-3.55075	NREP
229870_at	0.0299	-2.36941	LOC644656
218293_x_at	0.0301	-1.17379	NUP50
1562510_at	0.0301	-2.1167	LINC01343
233609_at	0.0301	-1.87366	PTPRK
221199_at	0.0304	-1.21002	GFRA4
220928_s_at	0.0305	-1.98042	PRDM16
233835_at	0.0306	-1.51666	LOC90246
1560224_at	0.0306	-2.58801	AHCTF1P1///AHCTF1
229390_at	0.0307	-1.01397	FAM26F
1560034_a_at	0.0307	-1.70826	FCN1
201645_at	0.0308	-2.04578	TNC
214537_at	0.0308	-2.13722	HIST1H1D
234049_at	0.0308	-2.42681	FAM86B3P
203854_at	0.0309	-1.05378	CFI
1570528_at	0.031	-2.26685	XYLT2
214350_at	0.0312	-2.19057	SNTB2
1556641_at	0.0314	-2.14162	SLC7A14
222549_at	0.0315	-2.24109	CLDN1
226930_at	0.0315	-2.55818	FNDC1
228274_at	0.0317	-2.77497	SDSL
241994_at	0.0318	-2.84399	XDH
231668_x_at	0.0321	-1.82519	IGHG1
241811_x_at	0.0321	-3.28032	SLC6A4
1562991_at	0.0321	-1.99075	ZNF292
223782_s_at	0.0322	-1.10905	TINAG
209504_s_at	0.0323	-2.33764	PLEKHB1
207011_s_at	0.0326	-1.06788	PTK7
1552455_at	0.0328	-1.14524	PRUNE2
1561514_at	0.0329	-2.99593	LOC400655
228056_s_at	0.033	-1.85809	NAPSB
205284_at	0.0331	-1.03385	URB2
202793_at	0.0331	-2.035	LPCAT3
208180_s_at	0.0333	-2.42089	HIST1H4H
234966_at	0.0335	-3.61915	KLK15
208394_x_at	0.0335	-2.28181	ESM1
222086_s_at	0.0336	-3.24139	WNT6
240032_at	0.0337	-2.7315	LOC105274304
234552_at	0.0338	-3.25361	EPPK1
217350_at	0.0339	-1.94334	MIR492///KRT19P2
230583_s_at	0.0339	-2.30831	LOC100287728///ZNF75D
1558722_at	0.0339	-1.85022	ZNF252P
235052_at	0.0341	-2.16905	ZNF792
203256_at	0.0342	-2.8	CDH3
231382_at	0.0349	-1.09947	FGF18
1555963_x_at	0.0349	-1.13844	B3GNT7
243585_at	0.0351	-1.6586	ATP13A5
244155_x_at	0.0352	-2.44639	TOR2A
206319_s_at	0.0352	-2.50753	EPPIN-WFDC6///EPPIN
214993_at	0.0352	-3.91605	ASPHD1
211128_at	0.0354	-1.15595	EDA
214472_at	0.0357	-1.34156	HIST1H3F///HIST1H3B///HIST1H3H///HIST1H3J///HIST1H3G///HIST1H3I///HIST1H3E///HIST1H3C///HIST1H3D///HIST1H3A///HIST1H2AD
208511_at	0.036	-2.25995	PTTG3P
213462_at	0.036	-1.45464	NPAS2
215906_at	0.0361	-2.62739	Igk
225966_at	0.0362	-1.98347	C17orf89
205056_s_at	0.0362	-2.07387	GPR162
231187_at	0.0365	-1.31241	SLC28A1
1559433_at	0.0367	-3.38169	APCDD1L-AS1
206914_at	0.0368	-2.24955	CRTAM
226526_s_at	0.0368	-2.21059	CKAP4
211719_x_at	0.0369	-1.01199	FN1
203021_at	0.0369	-1.36157	SLPI
212173_at	0.0371	-1.13232	AK2
1563082_at	0.0374	-2.5389	LINC00486
243608_at	0.0375	-1.83554	COG2
1561678_at	0.0376	-2.37684	LOC101929486
210002_at	0.0377	-1.12438	GATA6
1562930_at	0.0378	-1.70275	SRRM2-AS1
239663_x_at	0.0379	-1.39556	LARP1
224580_at	0.0379	-2.32312	SLC38A1
206514_s_at	0.0379	-1.68065	CYP4F2///CYP4F3
231179_at	0.038	-1.41802	IP6K3
209294_x_at	0.0382	-1.73208	TNFRSF10B
210146_x_at	0.0385	-1.15703	LILRB2
221017_s_at	0.039	-2.27563	LRRC3
240024_at	0.0391	-2.82758	SEC14L2
230547_at	0.0392	-2.53159	KCNC1
233019_at	0.0392	-1.25211	CNOT7
232542_at	0.0393	-2.20225	COL9A2
1555907_at	0.0393	-1.49723	AGAP2-AS1
1553582_a_at	0.0394	-1.68149	SPAG11A///SPAG11B
1557677_a_at	0.0396	-2.42367	TRIML1
1556368_at	0.0396	-2.80821	PHKG2
1553591_at	0.0397	-2.0831	BCRP3
202448_s_at	0.0398	-3.00329	ZER1
206008_at	0.0398	-2.00343	TGM1
230195_at	0.04	-2.55156	LINC01405
236976_at	0.0403	-2.30421	FANCA
1558858_at	0.0403	-1.94691	LOC100506885
1561884_at	0.0403	-1.27424	CEPT1
226034_at	0.0403	-1.0039	DUSP4
229854_at	0.0405	-1.91254	OBSCN
231693_at	0.0406	-2.1705	FABP1
234191_at	0.0406	-2.71914	BCL2L14
233745_at	0.0408	-1.54873	PTOV1-AS1
215133_s_at	0.0408	-2.66503	LOC102725213///LOC100507387///FAM153A///FAM153B
1557723_at	0.041	-1.58466	LOC285847
230256_at	0.0411	-1.027	RUSC1-AS1
210363_s_at	0.0413	-1.97476	SCN2B
221973_at	0.0413	-2.2693	LOC100506123///LOC100506076
1564837_at	0.0415	-1.52866	LOC151760
210000_s_at	0.0415	-1.98095	SOCS1
205159_at	0.0416	-1.32298	CSF2RB
210016_at	0.0416	-2.13235	MYT1L
229294_at	0.0417	-2.22149	JPH3
202018_s_at	0.042	-1.73336	LTF
1556426_at	0.042	-2.00019	HEXA
219369_s_at	0.0421	-2.28791	OTUB2
222087_at	0.0421	-2.59021	MIR1204///PVT1
239193_at	0.0421	-1.83069	FUBP3
210654_at	0.0423	-1.92807	TNFRSF10D
1569411_at	0.0424	-3.08528	TMEM67
1552368_at	0.0424	-1.23563	CTCFL
1559763_at	0.0424	-1.77527	ZC3H12C
239717_at	0.0425	-1.70279	CHRNA10
210132_at	0.0425	-1.8299	EFNA3
214710_s_at	0.0432	-2.22712	CCNB1
211916_s_at	0.0433	-1.97889	MYO1A
209924_at	0.0433	-2.24676	CCL18
1558365_at	0.0433	-2.68063	PGK1
229538_s_at	0.0434	-1.92994	IQGAP3
236953_s_at	0.0434	-1.17981	NHLRC3
1557405_at	0.0434	-2.96804	LOC100130111
224746_at	0.0434	-1.20379	KIAA1522
219640_at	0.0435	-1.18869	CLDN15
240041_at	0.0439	-3.31324	PTCHD1
209891_at	0.0439	-2.06043	SPC25
204359_at	0.0441	-1.01962	LOC100506718///FLRT2
204492_at	0.0445	-1.92347	ARHGAP11A
1569338_at	0.0445	-1.49803	LOC101928123
240822_at	0.0445	-1.73882	TDP1
205265_s_at	0.0446	-1.52002	LOC100996693///SPEG
213745_at	0.0447	-2.42806	ATRNL1
216983_s_at	0.0447	-2.37874	ZNF224
214013_s_at	0.0447	-2.77703	TBC1D1
214044_at	0.0451	-1.93121	RYR2
1560833_at	0.0451	-2.07422	LOC101927827///LINC01189
239810_at	0.0453	-2.07664	VASH1
232267_at	0.0453	-1.48204	ADGRD1
205999_x_at	0.0454	-2.45636	CYP3A4
220475_at	0.0456	-1.55827	SLC28A3
220066_at	0.0456	-1.57143	NOD2
1560705_at	0.0461	-2.27607	SLC25A28
208079_s_at	0.0462	-1.43074	AURKA
208307_at	0.0463	-1.64117	RBMY1J///RBMY1E///RBMY1D///RBMY1B///RBMY1F///RBMY1A1
213823_at	0.0464	-2.41306	HOXA11
203591_s_at	0.0465	-1.42154	CSF3R
210168_at	0.0465	-1.15401	C6
1566916_at	0.0467	-3.27034	HPYR1
204397_at	0.0468	-1.41526	EML2
204679_at	0.0468	-1.33031	KCNK1
204614_at	0.047	-3.42216	SERPINB2
216595_at	0.0471	-1.29886	FAM186A
1562950_at	0.0473	-3.23077	LOC101927210
240537_s_at	0.0475	-3.1158	CDIPT-AS1
230165_at	0.0476	-1.31164	SGO2
205613_at	0.0476	-1.12911	SYT17
208520_at	0.0481	-2.06306	OR10H3
1564729_at	0.0482	-2.80258	LOC101928666
237319_at	0.0484	-2.09313	PRR30
232230_at	0.0484	-1.36637	OLMALINC
235090_at	0.0484	-2.09354	ZNF710
217151_at	0.0485	-3.24416	LOC101928457
213927_at	0.0485	-2.03014	MAP3K9
1553880_at	0.0487	-1.61597	C10orf91
221872_at	0.0488	-1.33328	RARRES1
232355_at	0.049	-2.58029	SNORD114-3
228515_at	0.0491	-1.67586	LOC90784///POLR1A
1552943_at	0.0492	-2.4274	GABRG1
243924_at	0.0492	-2.57414	LINC00665
205909_at	0.0492	-1.51069	POLE2
239318_at	0.0493	-1.894	FAM118B
224480_s_at	0.0495	-1.15535	GPAT3
229608_at	0.0497	-1.86119	LOC101928718///FAM212B
235111_at	0.0498	-2.31691	LSAMP
ID refers to a unique transcript and was given by XXX chip annotation.
Abrevation: VAT,visceral adipose tissue; P,P value; logFC,log Fold Change.
Notes:The yellow mark shows that genes are affiliated with the significantly associated CpG sites in meta-analysis.
p value less than or equal to 0.05.
